## Original Article

### Associations between Traditional Chinese Medicine Body Constitution and Cardiovascular Disease Risk in a White population

Lihua Shu <sup>a,1</sup>, Xiaolin Yin <sup>b,1</sup>, Xiangzhu Zhu <sup>c,1</sup>, Jing Zhao <sup>d</sup>, Xinqing Deng <sup>e</sup>, Yevheniy Eugene Shubin <sup>f</sup>, Harvey J. Murff <sup>g</sup>, Reid M. Ness <sup>h</sup>, Chang Yu <sup>i</sup>, Martha J. Shrubsole <sup>c</sup>, Qi Dai <sup>c\*</sup>

<sup>a</sup> School of Medicine, Vanderbilt University School of Medicine, Nashville, TN, USA

<sup>b</sup> Shanghai Municipal Hospital of Traditional Chinese Medicine affiliated to Shanghai University of Traditional Chinese Medicine, Shanghai, China

<sup>c</sup> Department of Medicine, Division of Epidemiology, Vanderbilt University School of Medicine, Vanderbilt-Ingram Cancer Center, Vanderbilt University Medical Center, Nashville, TN, USA

<sup>d</sup> Atrium Health, Center for Outcome Research and Evaluation, Charlotte, NC, USA

<sup>e</sup> Department of Medicine, Vanderbilt University School of Medicine, Vanderbilt University Medical Center, Nashville, TN, USA

<sup>f</sup> Saint Joseph Health System, South Bend, IN, USA

<sup>g</sup> Department of Medicine, Division of Geriatric Medicine; Vanderbilt University Medical Center, Nashville, TN, USA

<sup>h</sup> Department of Medicine, Division of Gastroenterology, Hepatology, and Nutrition, Vanderbilt University Medical Center, Nashville, TN, USA

<sup>i</sup> Department of Biostatistics, Vanderbilt University School of Medicine, Vanderbilt University Medical Center, Nashville, TN, USA

<sup>1</sup> The authors contributed equally to this work as co-first authors

**\* Corresponding author at:** Department of Medicine, Division of Epidemiology, Vanderbilt University Medical Center, 2525 West End Ave, Nashville, TN 37203-1738.

E-mail: [qi.dai@vanderbilt.edu](mailto:qi.dai@vanderbilt.edu)

**Running Title:** Associations of TCM Body Constitutions and Cardiovascular Disease

**Keywords:** Chinese Traditional Medicine, Body Constitution, Cardiovascular, CRP, Uric acid

**Word count:** 3,630

## **Abstract**

**Introduction** Traditional Chinese medicine (TCM) has guided generations of practice on disease treatment and health maintenance. The TCM principles include the framework of body constitution (BC). In essence, it represents one of the first attempts at applying the principle of personalized, precision medicine. Major limitations to broad implementation of the body constitution (BC) framework, and perhaps TCM as a whole, include not only a lack of empirical study about its relation to other models of health maintenance but also a poor understanding of its applicability outside of Chinese population.

**Methods** We conducted a study using baseline data from the Personalized Prevention of Colorectal Cancer Trial. 191 participants from an almost entirely White population were evaluated for BC type.

**Results** Fifty-seven (29.8%) were identified as neutral BC, while Blood-stasis (17.3%), Qi-deficient (13.6%), and Special diathesis (10.5%) were the pre-eminent pathologic subtypes. We also found there are substantial differences in proportions of TCM BC types in our study of white Americans conducted in US from previous studies conducted in Chinese populations. Additional analyses investigated the relationship between cardiovascular disease (CVD) risk and BC subtypes. Among them, Yang-deficiency, Yin-deficiency, and Blood stasis carried a lower risk of CVD.

**Conclusions** It is important to understand the underlying mechanisms contributing to these differences, which may not only help to understand the underlying mechanism for TCM, but also help to identify novel factors or mechanisms for CVD risk, prevention and treatment.

## 1 **Introduction**

2  
3 In Traditional Chinese Medicine (TCM), a primary framework of health maintenance and  
4 surveillance hinges upon the classification of individuals into nine categories of “body  
5 constitutions” (BC): Gentleness type, Qi-deficiency type, Yang-deficiency type, Yin-deficiency  
6 type, Phlegm-dampness type, Dampness-heat type, Blood-stasis type, Qi-depression type, and  
7 Special diathesis type <sup>1</sup>. These BCs help to draw a picture of an individual’s health status and  
8 have been used on a provider-specific basis to identify patients who may be at risk for future  
9 disease, such as cardiovascular disease (CVD). However, TCM has a very limited role in  
10 Western medical practice and part of the reason for this is a simple lack of data concerning its  
11 application in Western populations. Additionally, while BCs are generally assigned based on  
12 different measures of an individual’s health, there exists little in the way of standardization when  
13 it comes to broadly applying this health framework in the clinical setting <sup>2-5</sup>. What is more, there  
14 have been few studies regarding the relationship between TCM principles and contemporary  
15 models of health and disease. For example, the BC types of Yin and Yang-deficiency, which  
16 describe individuals who are routinely hot/anxious or cold/sluggish, seem to hint at  
17 manifestations of thyroid disease. Despite these parallels, little has been done to study what  
18 possible relations may exist between the BC framework and our current understanding of health  
19 and disease. Studies of this kind may not only help us understand more about the BC principle,  
20 but may also establish a role for BCs in current medical practices, such as in diagnostic screens.  
21  
22 Su et al. developed the most commonly used questionnaire to stratify individuals into the 9 major  
23 BC types <sup>6,7</sup>. With this more standard approach, a number of studies have attempted to then  
24 explore utility of the TCM BC structure, specifically with the intent to identify a biological basis

25 for the different BC types. In one particular study, associations between TCM BC types and  
26 HLA polymorphisms were identified <sup>8</sup>. In a similar study, it was discovered that specific BC  
27 types are more likely to carry genetic variations of metabolic genes <sup>9</sup>. These efforts represent  
28 attempts to ground the principles of the TCM BC framework in empiric data that explores  
29 physiologic and genetic bases for the different TCM BCs. This will in turn help identify clinical  
30 associations to chronic disease.

31  
32 CVD is of particular interest in this study. It remains the leading cause of death worldwide, in  
33 particular due to its subtypes of coronary artery disease (CAD), as well as its manifestations of  
34 acute coronary syndrome (ACS) and myocardial infarction (MI) <sup>10,11</sup>. The landmark Framingham  
35 Heart study provided data to establish what are now well-known risk factors of CVD, including  
36 cigarette smoking, cholesterol, blood pressure, and others <sup>12</sup>. Understanding and identifying these  
37 risk factors have led to major advances in health maintenance, including the advent of routine  
38 blood pressure monitoring, regular exercise, and lipid control. Nonetheless, heart disease remains  
39 the leading cause of death in the US. Thus, there is a need to identify other early markers of  
40 CVD or populations at greatest risk to further preventive cardiology. The relationship of TCM  
41 BCs and markers of chronic disease, including dyslipidemia, hypertension, diabetes, etc., have  
42 further been studied and helped foster increased interest in the TCM BC system, as they might  
43 serve as an early indicator of needed intervention for specific chronic illnesses <sup>13-15</sup>.

44  
45 However, all of these previous studies using TCM BC have been conducted in Chinese  
46 populations except for one study of 400 White college students attending three Beijing  
47 universities in China <sup>16</sup>. In addition, none of the previous studies have examined the associations

48 between TCM BCs and CVD risk. To that end, the aim of this study is to investigate the ability  
49 for TCM BCs to identify participants at higher risk for CVD per general cardiovascular risk  
50 score (GCRS), an updated version of the original Framingham risk score (FRS), in a US  
51 population of white individuals; whether TCM BC is a better correlate of biomarkers of CVD  
52 (C-reactive protein (CRP) and uric acid)<sup>17,18</sup> than the GCRS; and whether TCM BC is associated  
53 with weight, body mass index and waist-to-hip ratio. In the same way that the Framingham  
54 study gave physicians insight on which health parameters may predict later heart disease, we  
55 seek to determine the potential value of utilizing TCM BCs in the clinical setting to predict CVD  
56 development<sup>19,20</sup>.

57

## 58 **Materials and Methods**

59 We conducted a cross-sectional study using baseline data from the Personalized Prevention of  
60 Colorectal Cancer Trial (PPCCT; NCT01105169 at ClinicalTrials.gov). The primary aim of the  
61 PPCCT was to examine the effect of Mg supplementation on expression of carcinogenesis  
62 biomarkers in colorectal mucosa. Between 2010 and 2017, the PPCCT enrolled 250 participants,  
63 aged 40 to 85 years, with high risk of colorectal cancer from Vanderbilt University Medical  
64 Center. Detailed inclusion and exclusion criteria have been reported (Supplemental materials)  
65 <sup>21,22</sup>. The study was approved by the Vanderbilt Institutional Review Board.

66

## 67 **Constitution in Traditional Chinese Medicine Questionnaire**

68 A self-administered Traditional Chinese Medicine Questionnaire (TCMQ) was implemented for  
69 a subset of participants enrolled from May 31, 2012 to Jan 30, 2016 (n=191). The original

70 version of the standardized Constitution in TCMQ was developed in China with sensitivity and  
71 specificity of predicting BC types ranging from 42.7% to 82.7%<sup>1,7</sup>. The TCMQ was translated to  
72 English by the research team and tested in cognitive debriefing interviews before it was applied  
73 in the study. The TCMQ consists of 60 questions, which fall into nine subscales that correspond  
74 to one of nine TCM BC types: Gentleness (8 Items), Qi-deficiency (8 Items), Yang-deficiency  
75 (7 Items), Yin-deficiency (8 Items), Phlegm-wetness (8 Items), Wetness-heat (6 Items), Blood-  
76 stasis (7 Items), Qi-depression (7 Items), and Special diathesis (7 Items). Six of the questions  
77 exhibit overlap between different subscales.

78 The 60-item questionnaire is graded on a 5-point Likert scale, ranging from 1 (not at all) to 5  
79 (very much). Each of the nine subscales within the TCMQ assess one type of the TCM BC  
80 individually. A total score of each subscale is obtained by summing relevant item scores<sup>23</sup>.  
81 Then, the transformed score was generated for each type by using the following equation.

$$\text{Transform score} = 100 \times \frac{\text{Original score} - \text{Num. of item}}{\text{Num. of item} \times 4}$$

82  
83 Following the criteria, a higher score in a specific TCMQ BC subscale indicates a higher  
84 likelihood of the corresponding BC type, with a score of 30 being a “threshold” for case  
85 definition. To ultimately classify a participant within a specific TCM BC, the following  
86 algorithm is applied: when 1) the score for the Gentleness subscale is greater than or equal to 60  
87 and other BC type scores are less than 30, the study participant is diagnosed as “Gentleness”  
88 which is considered the neutral BC; when 2) the score for an imbalanced BC type (all other BCs)  
89 is greater than or equal to 40, then the participant is regarded as one or more of eight imbalanced  
90 BC types; when 3) a BC type score is between 30-40, the diagnosis will be made by a well-

91 trained Chinese Medicine Practitioner. Based on the TCM theory, coexistence of multiple  
92 imbalanced BC types was possible.

### 93 **General cardiovascular risk score**

94 Participants completed a telephone interviewer-administered survey at baseline to solicit  
95 information on medical history, tobacco and alcohol use, and other risk factors for colorectal  
96 cancer. Persons who smoked cigarettes regularly, measured by packs per day, during the  
97 previous 12 months were classified as smokers. During each clinic visit, the participant's use of  
98 medications and biosamples were collected. Weight, height, waist and hip circumference as well  
99 as systolic and diastolic blood pressure, were measured. Body mass index (BMI) ( $\text{kg}/\text{m}^2$ ) and  
100 waist hip ratio (WHR) were calculated. Serum samples were assayed for a lipid profile (low-  
101 density lipoproteins cholesterol (LDL-C), high-density lipoproteins cholesterol (HDL-C), total  
102 cholesterol (TC), and triglycerides, c-reactive protein (CRP), and uric acid at the Vanderbilt  
103 Lipid Laboratory which is standardized by the Centers for Disease Control and Prevention for  
104 lipid analysis (Supplemental materials). Those used antihypertensive medication, blood pressure  
105 categorization was made accordingly. Participant characteristics were then assigned specific  
106 point values, with total points being then converted to a general cardiovascular risk score,  
107 representing a person's 10yr risk of CVD. This score is a derivative of the original Framingham  
108 risk score (FRS) produced by the same group. However, it was reported to be better in predicting  
109 CVD risk, which may be explained by the modeling of risk factors continuous variables (as  
110 opposed to categories in the model developed by Wilson et al)<sup>24</sup>. A risk assessment calculator  
111 based on the Cox regression model of proportional hazards was utilized to obtain participant  
112 GCRS<sup>25</sup>.

113 Females:



114 Risk factors =  $(\ln(\text{Age}) * 2.32888) + (\ln(\text{Total cholesterol}) * 1.20904) - (\ln(\text{HDL cholesterol}) *$

115  $0.70833) + (\ln(\text{Systolic BP}) * \text{Hypertension medication factor}) + \text{Cig} + \text{DM} - 26.1931$

116 Risk =  $100 * (1 - 0.95012e^{\text{Risk factors}})$

117 Hypertension medication factor: 2.76157 (not on medication) vs 2.82263 (on medication)

118 Cig = 0.52873

119 DM = 0.69154

120 Males:

121 Risk factors =  $(\ln(\text{Age}) * 3.06117) + (\ln(\text{Total cholesterol}) * 1.12370) - (\ln(\text{HDL cholesterol}) *$

122  $0.93263) + (\ln(\text{Systolic BP}) * \text{Hypertension medication factor}) + \text{Cig} + \text{DM} - 23.9802$

123 Risk =  $100 * (1 - 0.88936e^{\text{Risk factors}})$

124 Hypertension medication factor: 1.93303 (not on medication) vs 1.99881 (on medication)

125 Cig = 0.65451

126 DM = 0.57367

127 HDL: high-density lipoproteins; BP: blood pressure; Cig: cigarette smoking status; DM: Diabetes.

## 128 **Statistical analyses**

129 We performed generalized linear model for continuous variables or Pearson chi-squared tests for

130 categorical variable to evaluate the differences among the nine types of TCM BC. We further

131 evaluated the impact of significant differences among Gentleness group, Low CVD risk group

132 and the remaining group. Mean  $\pm$  standard deviation for continuous demographic variables and

133 percentage for categorical demographic variables were presented in Table 2 and Table 3.

134 Additionally, we performed analyses stratified by sex. All P values are two sided and statistical

135 significance was determined using an alpha level of 0.05. The data analyses used software SAS  
136 Enterprise Guide 7.1.

137

## 138 **Results**

139 For the reliability and validity of the self-administered Traditional Chinese Medicine  
140 Questionnaire (English Version), the construct validity was confirmed with scaling success rates  
141 that ranged from 75.0 to 100% (Supplemental Table 2), and confirmatory factor analysis indicate  
142 an acceptable model fit. The results of reliability for test-retest reliability (intra-class correlation  
143 coefficients) were 0.7-0.8 (Supplemental Table 3), the Cronbach's alphas ranged from 0.44 to  
144 0.72 during three-month period.

145

146 As shown in Table 1, the distribution of BC types varied greatly between this study and previous  
147 studies conducted in Chinese populations. Gentleness (29.8%) was the predominant BC type in  
148 this study, while the three most common pathologic BC types were Blood-stasis (17.3%), Qi-  
149 deficient (13.6%), and Special diathesis (10.5%). In contrast, the most common pathologic BC  
150 types found in Chinese populations, in no particular order, were Qi-deficient, Yang-deficient,  
151 Yin-deficient, and Phlegm-Dampness.

152

153 The characteristics of the study participants are shown overall and by BC type in Table 2.  
154 Among the 191 participants, the median age was 60, a minority were active smokers, and a

155 majority were using anti-hypertensive and anti-lipid medications, both of which reflect a higher  
156 risk of CVD. There were statistically significant differences in the distribution of several factors  
157 across the various BC types. These included BMI, gender, CRP, and GCRS. Specifically, the  
158 Gentleness BC had a generally lower average BMI (28.9), CRP (2.2), and GCRS (20.6), as well  
159 as lower female predominance (26.3%) compared to other groups.

160

### 161 *Comparison of cardiovascular disease risk among TCM subtypes*

162 Among participants using hypertensive medication, the three most common BC types were  
163 Gentleness (26.9%), Qi-deficient (21.8%), and Blood-stasis (15.4%) (results not shown in table).  
164 On the other hand, the predominant types among participants using lipid control medications  
165 were Gentleness (27.9%), Qi-deficient (19.1%), Blood stasis (17.7%), and Special diathesis  
166 (11.8%) (results not shown in table). The GCRS averages, which represent a 10-year risk of  
167 cardiovascular disease, were statistically significantly different across BC types ( $p=0.013$ ).  
168 Specifically, individuals in Yang-deficiency (6.4), Blood stasis (12.9), and Yin-deficiency (13.2),  
169 had a substantially lower risk of cardiovascular disease than other groups (Table 2). These BC  
170 types were also more common among women than among men.

171 To further investigate the characteristics of the three BC types with lower CVD risk, we  
172 combined individuals of these BC types into one low-risk group, and compared this new group  
173 against both the normal “Gentleness” type and the combination of the other 5 TCM groups  
174 (Table 3). As previously noted, the low-risk group had a significantly higher proportion of  
175 women. Additionally, individuals in these groups were younger (57.8 y,  $p=0.047$ ) than their  
176 counterparts in the rest of the study (61.0 y and 60.8 y, respectively). They also tended to have a

177 higher average serum HDL-C ( $p=0.228$ ), which is known to be protective against CVD,  
178 compared to counterparts. This low-risk group also had the highest percentage of never-smokers  
179 and never-drinkers compared to the other groups, although this difference was not statistically  
180 significant. In stratified analysis by sex, there were no statistically significant differences for  
181 BMI, CRP, uric acid, or the GCRS (Table 4) by BC type.

182

### 183 *Stratified analyses by CRP and Uric acid levels*

184 Based on previous studies which linked elevated CRP and uric acid to increased CVD risk, we  
185 classified our study population into “normal” and “elevated” groups. Specifically, individuals  
186 with CRP levels  $>10$  mg/dL and uric acid  $>5.5$  mg/dL were sorted into elevated CRP and uric  
187 acid groups, respectively. Average GCRS were 14.7 and 19.9 in the elevated and normal CRP  
188 groups, respectively; on the other hand, average GCRS was 21.7 and 16.8 in the elevated and  
189 normal uric acid groups, respectively. Analyses were then conducted to identify if specific TCM  
190 subtypes were associated with elevated biomarker levels. While there were no noticeable  
191 differences in the distribution of individuals with elevated CRP levels, the low-risk CVD group  
192 had a significantly lower level of elevated uric acid (Table 3). Further analysis of these findings  
193 occurred by stratifying the population by gender. Results of these analyses were not significant  
194 in terms of the distribution of individuals with elevated CRP/Uric acid levels (Table 4).

195

196

## 197 **Discussion**

198 All previous studies of BC type have been conducted in Chinese populations except for a study  
199 of White college students in China<sup>16</sup>. The present study, to the best of our knowledge, is the first

200 to be done in an American population <sup>26</sup>. The major types of TCM BC in our study of white  
201 individuals in the US were different from the types among Chinese in China. Furthermore, in this  
202 cross-sectional study, we newly examined the relationships between the nine BC types with  
203 predictive models or markers of CVD, in particular the GCRS.

204 Our study of white individuals in the US had a large proportion of Blood-Stasis (17.3%) and  
205 Special Diathesis types (10.5%). No previous study has been conducted in US populations. In a  
206 previous large study with 8,448 participants conducted within Chinese population, the most  
207 common pathologic BC subtypes are Qi-deficient (13.4%), Dampness-Heat (9.1%) and Yang-  
208 deficient (9.0%) <sup>27</sup>. The difference between our study of white individuals in the US and this  
209 large study conducted in Chinese population may be due to multiple factors. First, our study  
210 participants may not represent the general US population. Thus, our finding needs to be  
211 confirmed by future larger studies conducted in US population. Secondly, this difference could  
212 be due to different genetic background. Thirdly, the difference could be caused by regional  
213 environmental factors as our study was conducted in one state in the US. There was one previous  
214 study of Caucasian college students attending three Beijing Universities in China <sup>16</sup>. We found  
215 the distribution of major types of TCM BC in this earlier study is also different from that in our  
216 study. However, the White college students recruited in this earlier study were mostly younger  
217 than 50 years old and lived in Beijing, a Northern city in China while most of the participants in  
218 our study were older than 50 years and lived in a single US state. Thus, the differences could be  
219 caused by age and regional environmental factors.

220

221 Another potential explanation for these discrepancies may lie in identifying how biomarkers of  
222 common diseases contribute to an individual's TCM subtype. In our study, significant  
223 differences were found among the nine different BC types by various different biomarkers and  
224 vitals for cardiovascular disease. Some of these findings were expected, such as lower BMIs in  
225 the "healthy" Gentleness controls and the classically thinner Blood-stasis compositions<sup>28</sup>.  
226 However, the elevated BMIs in most other BC types, including the Phlegm-dampness and Yin-  
227 deficient types stand in contrast to findings in studies conducted in Chinese populations<sup>29</sup>.  
228 Again, the reason is unclear. For example, White, and in particular White Americans, peoples  
229 tend to have a higher overall BMI than Asian populations<sup>30</sup>. If BMI contributes to a person's  
230 TCM BC type, then it may help to explain the differences in proportion of TCM BC subtypes  
231 between an American and Chinese populations. Taken a step further this could reflect differences  
232 in disease prevalence, such as cardiovascular disease, from one population to another, as  
233 previous studies found the incidence rates of cardiovascular disease and cancers (i.e. breast  
234 cancer, colorectal cancer and prostate cancer) are much higher in US populations than in Chinese  
235 populations<sup>31,32</sup>. Zhu et al. also identified which TCM subtypes were more represented among  
236 major chronic diseases, including hypertension, hyperlipidemia, and hyperglycemia. Thus,  
237 further understanding the underlying mechanism for the difference in TCM BC type between US  
238 and Chinese population may help to identify the novel risk factors contributing to common  
239 disease etiology.

240 Another primary research focus of this study was the GCRS, which represents an individual's  
241 percent risk of cardiovascular disease (CVD) in 10 years, with a higher score necessarily  
242 translating to a higher percent risk. Again, our analyses revealed significant differences in the  
243 overall GCRS across BC types. Constitutions with the lowest average GCRS included Yang

244 deficient (6.4), Blood-stasis (12.9), and Yin deficient (13.2), while Dampness-Heat (DH) (27.4)  
245 and Qi-deficient (21.9) recorded the highest GCRS.

246 Further subgroup analysis of the three low-CVD risk groups (Yin/Yang-deficient and BS)  
247 revealed a significantly lower average age and BMI, as well as a higher predominance of  
248 women, compared to both the Gentleness group and the remaining 5 groups. This biologically  
249 makes sense in the context of the Framingham model, which typically associated men,  
250 particularly older and more obese men, with increased CVD risk. Another finding was a  
251 significantly lower uric acid level among the low-CVD risk group. While uric acid was not a  
252 component of the initial Framingham study, more recent literature has reported on an association  
253 between uric acid and CVD risk, specifically an association between elevated uric acid (>5.5)  
254 and increased CVD risk<sup>33</sup>. Stratified analyses by sex revealed a loss of significance in the  
255 differences in BMI, GCRS, and Uric acid. Mediation analysis was also conducted, which  
256 revealed no significant effect mediation by sex. Thus, the loss of statistical significance when  
257 stratified by sex may be due to reduced sample size as we also found the patterns still remained  
258 in the stratified analysis.

259 The major limitation of the study was the sample size, specifically the sample sizes in each BC  
260 group, which limits the power of the analysis in stratified analysis. Secondly, the limitation is  
261 that not all parts of the survey were easily translatable to English from the original Chinese  
262 version due to the cultural differences, with some questions, such as those involving “sighing  
263 without reason” or “thick saliva” perhaps being less readily answered by our exclusively  
264 American population. However, this only appeared in limited survey questions which may not  
265 materially affect the directions of results. Also, this non-differential misclassification caused by  
266 the translation in cultural difference usually biases the results to the null. In other words, the true

267 associations may be stronger than the ones we observed. Thirdly, the limitation is that we did not  
268 collect family history of cardiovascular disease and cannot adjust for this covariate in the current  
269 study. Further studies are warranted to examine whether family history of CVD contributes to  
270 the TCM BC types related to CVD risk. Finally, although the intra-class correlation coefficients  
271 ranging from 0.7 to 0.8 and the Cronbach's alphas ranging from 0.44 to 0.72 are reasonable for  
272 reliability, these findings indicate that TCM BC types could vary during the three-month period  
273 in a study of White individuals in the US. Further studies are warranted to identify the factors  
274 contributing to the changes.

275

276 The majority of previous studies conducted in Mainland China which have investigated a similar  
277 topic have noted significant associations between CAD and particular TCM BC types, in  
278 particular Yin/Yang deficiency as well as Phlegm-dampness<sup>14,34</sup>. These findings have helped  
279 practitioners in China to better identify patients at risk for CVD and therefore initiate a  
280 preventive health regimen. Additional studies have also postulated associations between BC  
281 types and chemokine receptor/ligand expression, which would hold implications for a whole host  
282 of pathologies, including immunology and oncology. Translating these promising findings to an  
283 American population could be beneficial, given the prevalence of CVD in the United States.  
284 However, our findings found although there are similarities, there are substantial differences  
285 between these two populations. Future studies should aim to understand the underlying  
286 mechanisms contributing to these differences, which may not only help to understand the  
287 underlying mechanism for TCM, but also help to identify novel factors or mechanisms for CVD  
288 risk, prevention and treatment.



289 In conclusion, future larger studies in US populations, particularly population-based studies  
290 including multiple racial/ethnic groups are warranted to confirm our findings. Further, future  
291 studies are also needed to examine whether combined use of BC type with the Framingham risk  
292 score can improve the Framingham risk score in predicting future risk of CAD in clinical  
293 settings.

294

## 295 **Abbreviations**

|     |       |                                       |
|-----|-------|---------------------------------------|
| 296 | ACS   | acute coronary syndrome               |
| 297 | BC    | body constitutions                    |
| 298 | BMI   | Body mass index                       |
| 299 | CAD   | coronary artery disease               |
| 300 | CVD   | cardiovascular disease                |
| 301 | CRP   | c-reactive protein                    |
| 302 | eGFR  | estimated glomerular filtration rate  |
| 303 | GCRS  | General cardiovascular risk score     |
| 304 | HDL-C | high-density lipoproteins cholesterol |
| 305 | LDL-C | low-density lipoproteins cholesterol  |
| 306 | MDRD  | Modification of Diet in Renal Disease |

307 MI myocardial infarction

308 TC total cholesterol

309 TCM Traditional Chinese Medicine

310 WHR waist hip ratio

311

### 312 **Acknowledgments**

313 The authors are grateful to the participants for participating in PPCCT. Authors thank the study  
314 staffs for their participation.

315

### 316 **Author contributions**

317 Qi Dai: contributed to the hypothesis development; Qi Dai, Martha Shrubsole, Xiaolin Yin,  
318 Xiangzhu Zhu: contributed to the study design; Qi Dai, Martha Shrubsole, Xiaolin Yin,  
319 Xiangzhu Zhu, Xinqing Deng and Yevheniy Eugene Shubin: conducted the research; Lihua Shu,  
320 Xiangzhu Zhu, Jing Zhao: performed statistical analysis; Lihua Shu, Xiangzhu Zhu, Qi Dai,  
321 Martha Shrubsole drafted the manuscript; All the authors: contributed to the data interpretation  
322 and manuscript revision and read and approved the final manuscript.

323

### 324 **Funding**

325 This study was supported by R01 CA149633 from the National Cancer Institute, R01DK110166  
326 from National Institute of Diabetes and Digestive and Kidney Diseases, Department of Health  
327 and Human Services as well as the Ingram Cancer Center Endowment Fund. Data collection,  
328 sample storage, and processing for this study were partially conducted by the Survey and  
329 Biospecimen Shared Resource, which is supported in part by P30CA68485. Clinical visits to the  
330 Vanderbilt at the Clinical Research Center were supported in part by the Vanderbilt CTSA grant  
331 UL1 RR024975 from NCRR/NIH. The parent study data were stored in Research Electronic  
332 Data Capture (REDCap), and data analyses (VR12960) were supported in part by the Vanderbilt  
333 Institute for Clinical and Translational Research (UL1TR000445).

334

#### 335 **Data availability**

336 The datasets generated during and/or analyzed during the current study are available from the  
337 corresponding author on reasonable request.

338

#### 339 **Author(s) disclosure**

340 The authors declare no competing interests.

## References

1. Wong W, Lam CL, Wong VT, et al. Validation of the constitution in chinese medicine questionnaire: does the traditional chinese medicine concept of body constitution exist? *Evid Based Complement Alternat Med* 2013;2013(481491), doi:10.1155/2013/481491
2. O'Brien KA, Abbas E, Zhang J, et al. An investigation into the reliability of Chinese medicine diagnosis according to Eight Guiding Principles and Zang-Fu Theory in Australians with hypercholesterolemia. *J Altern Complement Med* 2009;15(3):259-66, doi:10.1089/acm.2008.0204
3. O'Brien KA, Abbas E, Zhang J, et al. Understanding the reliability of diagnostic variables in a Chinese Medicine examination. *J Altern Complement Med* 2009;15(7):727-34, doi:10.1089/acm.2008.0554
4. Mist S, Ritenbaugh C, Aickin M. Effects of questionnaire-based diagnosis and training on inter-rater reliability among practitioners of traditional Chinese medicine. *J Altern Complement Med* 2009;15(7):703-9, doi:10.1089/acm.2008.0488
5. Birkeflet O, Laake P, Vollestad N. Low inter-rater reliability in traditional Chinese medicine for female infertility. *Acupunct Med* 2011;29(1):51-7, doi:10.1136/aim.2010.003186
6. Chen LL, Lin JS, Lin JD, et al. BCQ+: a body constitution questionnaire to assess Yang-Xu. Part II: Evaluation of reliability and validity. *Forsch Komplementmed* 2009;16(1):20-7, doi:10.1159/000197770
7. Su YC, Chen LL, Lin JD, et al. BCQ+: a body constitution questionnaire to assess Yang-Xu. Part I: establishment of a first final version through a Delphi process. *Forsch Komplementmed* 2008;15(6):327-34, doi:10.1159/000175938
8. Chen S, Lv F, Gao J, et al. HLA class II polymorphisms associated with the physiologic characteristics defined by Traditional Chinese Medicine: linking modern genetics with an ancient medicine. *J Altern Complement Med* 2007;13(2):231-9, doi:10.1089/acm.2006.6126
9. Wu Y, Cun Y, Dong J, et al. Polymorphisms in PPAR $\alpha$ , PPAR $\gamma$  and APM1 associated with four types of traditional Chinese medicine constitutions. *J Genet Genomics* 2010;37(6):371-9, doi:10.1016/S1673-8527(09)60055-2
10. Roger VL. Epidemiology of myocardial infarction. *Med Clin North Am* 2007;91(4):537-52; ix, doi:10.1016/j.mcna.2007.03.007
11. Virani SS, Alonso A, Aparicio HJ, et al. Heart Disease and Stroke Statistics-2021 Update: A Report From the American Heart Association. *Circulation* 2021;143(8):e254-e743, doi:10.1161/CIR.0000000000000950
12. Dawber TR, Kannel WB, Revotskie N, et al. Some factors associated with the development of coronary heart disease: six years' follow-up experience in the Framingham study. *Am J Public Health Nations Health* 1959;49(1349-56), doi:10.2105/ajph.49.10.1349
13. Wu HK, Ko YS, Lin YS, et al. The correlation between pulse diagnosis and constitution identification in traditional Chinese medicine. *Complement Ther Med* 2017;30(107-112), doi:10.1016/j.ctim.2016.12.005
14. Huang YC, Lin CJ, Cheng SM, et al. Using Chinese Body Constitution Concepts and Measurable Variables for Assessing Risk of Coronary Artery Disease. *Evid Based Complement Alternat Med* 2019;2019(8218013), doi:10.1155/2019/8218013
15. Zhu YJ, Zhang HB, Liu LR, et al. Yin-Cold or Yang-Heat Syndrome Type of Traditional Chinese Medicine Was Associated with the Epidermal Growth Factor Receptor Gene Status in Non-Small Cell Lung Cancer Patients: Confirmation of a TCM Concept. *Evid Based Complement Alternat Med* 2017;2017(7063859), doi:10.1155/2017/7063859

16. Ming-hua B. Applying Constitution in Chinese Medicine Questionnaire, designed by WANG Qi(English version) to survey TCM constitutions of the American and Canadian Caucasian in Beijing. *China Journal of Traditional Chinese Medicine and Pharmacy* 2012;
17. Lagrand WK, Visser CA, Hermens WT, et al. C-Reactive Protein as a Cardiovascular Risk Factor. *Circulation* 1999;100(1):96-102, doi:doi:10.1161/01.CIR.100.1.96
18. Borghi C, Piani F. Uric Acid and Risk of Cardiovascular Disease: A Question of Start and Finish. *Hypertension* 2021;78(5):1219-1221, doi:doi:10.1161/HYPERTENSIONAHA.121.17631
19. Hasan S, Naugler C, Decker J, et al. Laboratory reporting of framingham risk score increases statin prescriptions in at-risk patients. *Clin Biochem* 2021, doi:10.1016/j.clinbiochem.2021.06.004
20. Backus BE, Gerretsen BM. The contemporary significance of Framingham risk factors. *Eur J Emerg Med* 2021;28(3):167-168, doi:10.1097/MEJ.0000000000000824
21. Liu S, Liu Q. Personalized magnesium intervention to improve vitamin D metabolism: applying a systems approach for precision nutrition in large randomized trials of diverse populations. *Am J Clin Nutr* 2018;108(6):1159-1161, doi:10.1093/ajcn/nqy294
22. Dai Q, Zhu X, Manson JE, et al. Magnesium status and supplementation influence vitamin D status and metabolism: results from a randomized trial. *Am J Clin Nutr* 2018;108(6):1249-1258, doi:10.1093/ajcn/nqy274
23. Sun Y, Liu P, Zhao Y, et al. Characteristics of TCM constitutions of adult Chinese women in Hong Kong and identification of related influencing factors: a cross-sectional survey. *J Transl Med* 2014;12(140), doi:10.1186/1479-5876-12-140
24. Wilson PW, D'Agostino RB, Levy D, et al. Prediction of coronary heart disease using risk factor categories. *Circulation* 1998;97(18):1837-47, doi:10.1161/01.cir.97.18.1837
25. D'Agostino RB, Sr., Vasan RS, Pencina MJ, et al. General cardiovascular risk profile for use in primary care: the Framingham Heart Study. *Circulation* 2008;117(6):743-53, doi:10.1161/CIRCULATIONAHA.107.699579
26. Li L, Yao H, Wang J, et al. The Role of Chinese Medicine in Health Maintenance and Disease Prevention: Application of Constitution Theory. *Am J Chin Med* 2019;47(3):495-506, doi:10.1142/S0192415X19500253
27. Zhu YB, Wang Q, Chen KF, et al. [Stratified analysis of the relationship between traditional Chinese medicine constitutional types and health status in the general population based on data of 8,448 cases]. *Zhong Xi Yi Jie He Xue Bao* 2011;9(4):382-9, doi:10.3736/jcim20110406
28. Luo H, Li L, Li T, et al. Association between metabolic syndrome and body constitution of traditional Chinese medicine: A systematic review and meta-analysis. *Journal of Traditional Chinese Medical Sciences* 2020;7(4):355-365, doi:<https://doi.org/10.1016/j.jtcms.2020.10.004>
29. Li M, Mo S, Lv Y, et al. A Study of Traditional Chinese Medicine Body Constitution Associated with Overweight, Obesity, and Underweight. *Evid Based Complement Alternat Med* 2017;2017(7361896), doi:10.1155/2017/7361896
30. (NCD-RisC) NRFC. Trends in adult body-mass index in 200 countries from 1975 to 2014: a pooled analysis of 1698 population-based measurement studies with 19.2 million participants. *Lancet* 2016;387(10026):1377-1396, doi:10.1016/s0140-6736(16)30054-x
31. Lu Y, Wang P, Zhou T, et al. Comparison of Prevalence, Awareness, Treatment, and Control of Cardiovascular Risk Factors in China and the United States. *J Am Heart Assoc* 2018;7(3), doi:10.1161/JAHA.117.007462
32. Wang YC, Wei LJ, Liu JT, et al. Comparison of Cancer Incidence between China and the USA. *Cancer Biol Med* 2012;9(2):128-32, doi:10.3969/j.issn.2095-3941.2012.02.009
33. Rahimi-Sakak F, Maroofi M, Rahmani J, et al. Serum uric acid and risk of cardiovascular mortality: a systematic review and dose-response meta-analysis of cohort studies of over a million participants. *BMC Cardiovascular Disorders* 2019;19(1):218, doi:10.1186/s12872-019-1215-z

34. Xu F, Wu G, Miao J, et al. Coronary arterial disease correlates with constitutions of Traditional Chinese Medicine: A cross-sectional study in a Chinese cohort. *Traditional Medicine and Modern Medicine* 2018;01(03):199-205, doi:10.1142/s2575900018500118

**Table 1: Comparative distribution of TCM constitution types among PPCCT population and Representative Study population in China**

| Characteristic           | Study     |                    |                 |                    |                |                          |                         |
|--------------------------|-----------|--------------------|-----------------|--------------------|----------------|--------------------------|-------------------------|
|                          | PPCCT     | Caucasian in China |                 | Chinese Population |                |                          |                         |
|                          |           | Jing et al. 2012   | Zhu et al. 2011 | Zhu et al. 2017    | Li et al. 2017 | Bai et al. 2021          | Jiang et al. 2018       |
| Sample size, n           | 191       | 396                | 8448            | 2660               | 3748           | 313                      | 708                     |
| Age (y), Mean ± SD       | 60 ± 7.8  | 34.1 ± 14.3        | 41.6 ± 15.9     | 52.5 ± 13.9        | 69.3 ± 7.6     | 77.1 ± 8.22 <sup>1</sup> | 28.3 ± 3.0 <sup>2</sup> |
| Gender, n (%)            |           |                    |                 |                    |                |                          |                         |
| <i>Female</i>            | 91 (47.6) | 240 (60.6)         | 4153 (49.2)     | 1260 (47.4)        | 2039 (54.4)    | 268 (82.4)               | 708 (100)               |
| TCM Constitution type, % |           |                    |                 |                    |                |                          |                         |
| <i>Gentleness</i>        | 29.8      | 51.0               | 32.1            | 22.6               | 39.9           | 27.50                    | 45.2                    |
| <i>Qi-deficient</i>      | 13.6      | 9.6                | 13.4            | 19.1               | 22.9           | 5.43                     | 3.4                     |
| <i>Yang-deficient</i>    | 4.7       | 13.6               | 9.0             | 8.7                | 17.9           | 11.18                    | 23.0                    |
| <i>Yin-deficient</i>     | 6.3       | 4.5                | 8.3             | 8.5                | 6.6            | 23.30                    | 9.5                     |
| <i>Phlegm-Dampness</i>   | 8.4       | 5.1                | 7.3             | 11.1               | 6.0            | 16.90                    | 4.9                     |
| <i>Dampness-Heat</i>     | 3.1       | 3.5                | 9.1             | 9.3                | 2.5            | 0.64                     | 2.0                     |
| <i>Blood-Stasis</i>      | 17.3      | 2.5                | 8.1             | 8.1                | 1.5            | 3.83                     | 3.5                     |
| <i>Qi-depression</i>     | 6.3       | 4.0                | 7.7             | 7.3                | 1.1            | 8.95                     | 6.4                     |
| <i>Special Diathesis</i> | 10.5      | 6.1                | 5.0             | 5.4                | 1.7            | 2.24                     | 2.1                     |

Continuous variables were presented as Mean ± SD; categorical variables were presented as n (%) or %

<sup>1</sup>: Study conducted among an elderly population in Macau

<sup>2</sup>: Study was done in a population of only women of childbearing age

**Table 2: Baseline Characteristics of Participants Overall and Grouped by TCM BC Type**

| Characteristic                               | Overall              | Qi-                  | Yang-                | Yin-                | Phlegm-              | Dampness-          | Blood-stasis         | Qi-depression       | Special             | P value             |         |
|----------------------------------------------|----------------------|----------------------|----------------------|---------------------|----------------------|--------------------|----------------------|---------------------|---------------------|---------------------|---------|
|                                              | (n=191)              | Gentleness<br>(n=57) | deficiency<br>(n=26) | deficiency<br>(n=9) | deficiency<br>(n=12) | dampness<br>(n=16) | heat<br>(n=6)        | (n=33)              | Diathesis<br>(n=20) |                     |         |
| Age (y), Mean ± SD                           | 60.0 ± 7.8           | 61.0 ± 6.9           | 62.6 ± 7.8           | 55.0 ± 4.2          | 58.7 ± 5.7           | 60.4 ± 9.7         | 61.5 ± 9.3           | 58.2 ± 8.1          | 59.3 ± 7.9          | 59.6 ± 9.8          | 0.28    |
| BMI (kg/m <sup>2</sup> ), Mean ± SD          | 30.3 ± 6.7           | 28.9 ± 6.7           | 32.4 ± 7.2           | 31.4 ± 7.1          | 32.9 ± 7.2           | 34.2 ± 6.3         | 30.5 ± 6.3           | 28.1 ± 4.0          | 31.9 ± 7.4          | 29.4 ± 7.1          | 0.03    |
| Gender, n (%)                                |                      |                      |                      |                     |                      |                    |                      |                     |                     |                     | <0.0001 |
| Male                                         | 100 (52.4)           | 42 (73.7)            | 16 (61.5)            | 1 (11.1)            | 2 (16.7)             | 6 (37.5)           | 5 (83.3)             | 8 (24.2)            | 8 (66.7)            | 12 (60)             |         |
| Systolic Blood Pressure (mmHg),<br>Mean ± SD | 127.5 ± 15.3         | 129.1 ± 13.2         | 128.5 ± 18.3         | 117.7 ± 14.7        | 120.0 ± 16.3         | 130.4 ± 10.9       | 134.2 ± 9.8          | 128.9 ± 17.8        | 120.7 ± 16.6        | 128.0 ± 13.7        | 0.16    |
| Total cholesterol (mg/dL), Mean ± SD         | 204.7 ± 57.7         | 198.7 ± 54.7         | 198.1 ± 52.3         | 191.3 ± 37.3        | 216.8 ± 59.7         | 226.8 ± 70.9       | 162.2 ± 43.0         | 215.4 ± 69.9        | 201.1 ± 38.5        | 209.2 ± 55.8        | 0.36    |
| HDL (mg/dL), Mean ± SD                       | 61.2 ± 21.3          | 59.3 ± 20.8          | 58.8 ± 16.2          | 66.2 ± 9.3          | 61.0 ± 16.2          | 65.4 ± 36.2        | 44.7 ± 15.9          | 66.9 ± 23.3         | 58.3 ± 16.9         | 62.2 ± 18.5         | 0.42    |
| LDL (mg/dL), Mean ± SD                       | 118.5 ± 41.9         | 115.6 ± 43.2         | 112.9 ± 39.0         | 107.7 ± 28.9        | 126.3 ± 43.8         | 130.4 ± 40.5       | 96.5 ± 29.0          | 123.8 ± 49.3        | 120.8 ± 30.2        | 121.5 ± 44.8        | 0.72    |
| C-reactive Protein                           | 3.1 ± 3.9<br>(n=101) | 2.1 ± 2.1<br>(n=35)  | 3.5 ± 3.6<br>(n=16)  | 1.1 ± 1.1<br>(n=3)  | 7.3 ± 4.8<br>(n=6)   | 5.1 ± 5.8<br>(n=5) | 11.5 ± 15.5<br>(n=2) | 2.0 ± 1.2<br>(n=16) | 2.6 ± 3.7<br>(n=6)  | 3.3 ± 3.4<br>(n=12) | 0.003   |
| Uric acid                                    | 6.2 ± 1.7<br>(n=101) | 6.6 ± 1.8<br>(n=35)  | 6.5 ± 2.0<br>(n=16)  | 5.2 ± 1.5<br>(n=3)  | 6.0 ± 1.4<br>(n=6)   | 7.2 ± 1.3<br>(n=5) | 5.8 ± 0.8<br>(n=2)   | 6.5 ± 0.8<br>(n=16) | 5.4 ± 1.3<br>(n=6)  | 5.6 ± 1.3<br>(n=12) | 0.19    |
| General cardiovascular risk score            | 18.2 ± 14.1          | 20.6 ± 14.2          | 21.9 ± 14.9          | 6.4 ± 3.8           | 13.2 ± 13.3          | 17.7 ± 12.5        | 27.4 ± 20.4          | 12.9 ± 10.4         | 20.0 ± 17.0         | 20.1 ± 14.7         | 0.01    |
| Smoking status, n (%)                        |                      |                      |                      |                     |                      |                    |                      |                     |                     |                     | 0.09    |
| Never                                        | 102 (53.4)           | 28 (49.1)            | 16 (61.5)            | 6 (66.7)            | 6 (50)               | 10 (62.5)          | 4 (66.7)             | 22 (66.7)           | 4 (33.3)            | 6 (30)              |         |
| Ever/current                                 | 89 (46.6)            | 29 (50.9)            | 10 (38.5)            | 3 (33.3)            | 6 (50)               | 6 (37.5)           | 2 (33.3)             | 11 (33.3)           | 8 (66.7)            | 14 (70)             |         |
| Drinking status, n (%)                       |                      |                      |                      |                     |                      |                    |                      |                     |                     |                     | 0.22    |
| Never                                        | 70 (36.7)            | 17 (29.8)            | 13 (50)              | 4 (44.4)            | 6 (50)               | 8 (50)             | 2 (33.3)             | 12 (36.4)           | 5 (41.7)            | 3 (15)              |         |
| Ever                                         | 42 (21.9)            | 13 (22.8)            | 4 (15.4)             | 0 (0)               | 4 (33.3)             | 3 (18.8)           | 3 (50)               | 5 (15.2)            | 4 (33.3)            | 6 (30)              |         |



|                                             |            |           |           |          |           |          |          |           |           |         |      |
|---------------------------------------------|------------|-----------|-----------|----------|-----------|----------|----------|-----------|-----------|---------|------|
| Current                                     | 79 (41.4)  | 27 (47.4) | 9 (34.6)  | 5 (55.6) | 2 (16.7)  | 5 (31.3) | 1 (16.7) | 16 (48.5) | 3 (25)    | 11 (55) |      |
| Antihypertensive medication use, n (%)      | 78 (40.84) | 21 (36.9) | 17 (65.4) | 2 (22.2) | 6 (50)    | 6 (37.5) | 4 (66.7) | 12 (36.4) | 4 (33.3)  | 6 (30)  | 0.16 |
| Lipid control medication use, n (%)         | 68 (35.6)  | 19 (33.3) | 13 (50)   | 2 (22.2) | 4 (33.3)  | 3 (18.8) | 5 (83.3) | 12 (36.4) | 2 (16.7)  | 8 (40)  | 0.10 |
| Glycemic control medication use, n (%)      | 22 (11.52) | 6 (10.6)  | 5 (19.23) | 1 (11.1) | 2 (16.7)  | 2 (12.8) | 2 (33.3) | 0 (0)     | 1 (8.3)   | 3 (15)  | 0.31 |
| Physically active $\geq 2$ days/week, n (%) | 162 (84.8) | 52 (91.2) | 22 (84.6) | 6 (66.7) | 9 (75)    | 12 (75)  | 4 (66.7) | 28 (84.9) | 11 (91.7) | 18 (90) | 0.38 |
| Education college or beyond                 | 173 (90.6) | 53 (92.9) | 24 (92.3) | 9 (100)  | 11 (91.7) | 12 (75)  | 5 (83.3) | 32 (96.9) | 9 (75)    | 18 (20) | 0.18 |

Continuous variables were presented as mean  $\pm$ SD, *P* values were calculated using GLM model; categorical variables presented as n (%), *P* values were calculated using chi-square test.

LDL: low-density lipoproteins; HDL high-density lipoproteins

**Table 3: Stratified analysis of neutral BC group, low CVD risk group, and remaining groups**

| Characteristics                      | Gentleness   | Low CVD risk group  | Remaining groups    | P-value |
|--------------------------------------|--------------|---------------------|---------------------|---------|
|                                      | (n=57)       | (n=54) <sup>1</sup> | (n=80) <sup>2</sup> |         |
| Age (y), Mean ± SD                   | 61.0 ± 6.9   | 57.8 ± 7.1          | 60.8 ± 8.7          | 0.047   |
| BMI (kg/m <sup>2</sup> ), Mean ± SD  | 28.9 ± 6.7   | 29.7 ± 5.7          | 31.7 ± 7.0          | 0.037   |
| Gender (n), %                        |              |                     |                     | <0.0001 |
| <i>Male</i>                          | 42 (73.7)    | 11 (20.4)           | 47 (58.8)           |         |
| <i>Female</i>                        | 15 (26.3)    | 43 (79.6)           | 33 (42.3)           |         |
| Systolic Blood Pressure (mmHg),      |              |                     |                     |         |
| Mean ± SD                            | 129.1 ± 13.2 | 125.1 ± 17.4        | 128 ± 15.2          | 0.368   |
| Total cholesterol (mg/dL), Mean ± SD | 198.7 ± 54.7 | 211.7 ± 63.2        | 204.4 ± 56.1        | 0.498   |
| HDL (mg/dL), Mean ± SD               | 59.3 ± 20.8  | 65.4 ± 20.0         | 59.8 ± 22.3         | 0.228   |
| LDL (mg/dL), Mean ± SD               | 115.6 ± 43.2 | 121.7 ± 45.1        | 118.5 ± 39.2        | 0.749   |
| C-reactive Protein (mg/L), Mean ± SD | 2.1 ± 2.1    | 3.5 ± 4.3           | 3.8 ± 4.6           | 0.146   |
| CRP level (elevated), n (%)          | 0 (0)        | 3 (12)              | 4 (9.8)             | 0.128   |
|                                      | 6.6 ± 1.8    | 5.5 ± 1.3           | 6.3 ± 1.6           | 0.039   |
| Uric acid level (elevated), n (%)    | 23 (65.7)    | 7 (28)              | 21 (51.2)           | 0.0157  |
| General cardiovascular risk score    | 20.6 ± 14.2  | 11.9 ± 10.5         | 20.7 ± 15.0         | 0.0005  |
| Smoking (n), %                       |              |                     |                     | 0.344   |
| <i>Never</i>                         | 28 (49.1)    | 34 (62.9)           | 40 (50.0)           |         |
| <i>Ever</i>                          | 25 (43.9)    | 17 (31.5)           | 30 (37.5)           |         |
| <i>Current</i>                       | 4 (7.02)     | 3 (5.6)             | 10 (12.5)           |         |
| Drinking (n), %                      |              |                     |                     | 0.536   |
| <i>Never</i>                         | 17 (29.8)    | 22 (40.7)           | 31 (38.8)           |         |
| <i>Ever</i>                          | 13 (22.8)    | 9 (16.7)            | 20 (25)             |         |
| <i>Current</i>                       | 27 (47.4)    | 23 (42.6)           | 29 (36.3)           |         |
| Antihypertensive medications, %      | 21 (36.8)    | 20 (37.0)           | 37 (46.3)           | 0.434   |
| Lipid control medications, %         | 19 (33.3)    | 18 (33.3)           | 31 (38.8)           | 0.742   |
| Glycemic control medications, %      | 6 (10.6)     | 3 (5.6)             | 13 (16.3)           | 0.158   |

<sup>1</sup> Consists of pooled participants from Yang-deficient, Yin-deficient, and Blood-Stasis BC subtypes

<sup>2</sup> Consists of pooled participants from Qi-deficient, Phlegm-Dampness, Dampness-Heat, Qi-depression, and Special diathesis BC subtypes.

CRP elevated:>3.0mg/L, uric acid elevated:>7.0 mg/dL

P values were calculated using GLM model; categorical variables presented as n (%), P values were calculated using chi-square test.

**Table 4: Analysis of neutral BC group, low CVD risk group, and remaining groups by sex**

| Characteristics                      | BC Type               |                                 |                              | P-value |
|--------------------------------------|-----------------------|---------------------------------|------------------------------|---------|
|                                      | Gentleness            | Low CVD risk group <sup>1</sup> | Remaining group <sup>2</sup> |         |
| Men                                  |                       |                                 |                              |         |
| BMI (kg/m <sup>2</sup> ), Mean ± SD  | 29.8 ± 6.5<br>(n=42)  | 29.2 ± 4.2<br>(n=11)            | 32.0 ± 6.3<br>(n=47)         | 0.16    |
| C-reactive Protein (mg/L), Mean ± SD | 1.8 ± 1.6<br>(n=28)   | 1.3 ± 1.1<br>(n=6)              | 3.8 ± 5.0<br>(n=27)          | 0.09    |
| CRP level (elevated), n (%)          | 0 (0)                 | 0 (0)                           | 3 (11.1)                     | 0.14    |
| Uric acid (mg/dL), Mean ± SD         | 6.9 ± 1.9<br>(n=28)   | 5.7 ± 1.6<br>(n=6)              | 6.8 ± 1.6<br>(n=27)          | 0.27    |
| Uric acid level (elevated), n (%)    | 21 (75)               | 3 (50)                          | 18 (66.7)                    | 0.46    |
| General cardiovascular risk score    | 24.2 ± 14.7<br>(n=42) | 23.4 ± 14.2<br>(n=11)           | 27.2 ± 14.9<br>(n=47)        | 0.55    |
| Female                               |                       |                                 |                              |         |
| BMI (kg/m <sup>2</sup> ), Mean ± SD  | 26.4 ± 6.8<br>(n=15)  | 29.8 ± 6.1<br>(n=43)            | 31.3 ± 8.1<br>(n=33)         | 0.08    |
| C-reactive Protein (mg/L), Mean ± SD | 3.2 ± 3.4<br>(n=7)    | 4.2 ± 4.7<br>(n=19)             | 3.8 ± 4.0<br>(n=14)          | 0.86    |
| CRP level (elevated), n (%)          | 0 (0)                 | 3 (15.8)                        | 1 (7.1)                      | 0.45    |
| Uric acid (mg/dL), Mean ± SD         | 5.3 ± 1.0<br>(n=7)    | 5.5 ± 1.2<br>(n=19)             | 5.3 ± 1.2<br>(n=14)          | 0.87    |
| Uric acid level (elevated), n (%)    | 2 (28.6)              | 4 (26.7)                        | 3 (21.4)                     | 0.91    |
| General cardiovascular risk score    | 10.3 ± 4.8<br>(n=15)  | 8.9 ± 6.9<br>(n=43)             | 11.5 ± 9.2<br>(n=33)         | 0.35    |

<sup>1</sup> Consists of pooled participants from Yang-deficient, Yin-deficient, and Blood-Stasis BC subtypes

<sup>2</sup> Consists of pooled participants from Qi-deficient, Phlegm-Dampness, Dampness-Heat, Qi-depression, and Special diathesis BC subtypes

*P* values were calculated using GLM model; categorical variables presented as n (%), *P* values were calculated using chi-square test.
